# Supplementary material for: Strategy for achieving efficient electroluminescence with reduced efficiency roll-off: enhancement of hot excitons spin mixing and restriction of internal conversion by twisted structure regulation using an anthracene derivative
Source: Royal Society of Chemistry journal article supplement (doi:10.1039/c9tc00789j), 2019-01-01
Supplement: c9tc00789j1.pdf [file c9tc00789j1.pdf]

## Supporting Information

A Strategy for Achieving Efficient Electroluminescence with Reduced Efficiency Roll-off: Enhancement of Hot Excitons Spin Mixing and Restriction of Internal Conversion by Twisted Structure Regulation from Anthracene Derivative

*Yue Yu<sup>a,b</sup>, Lin Ma<sup>\*a</sup>, Zhao Feng<sup>b</sup>, Boao Liu<sup>b</sup>, Huixin Zhou<sup>a</sup>, Hanlin Qin<sup>a</sup>, Huan Li<sup>a</sup>, Jiangluqi Song<sup>a</sup>, Guijiang Zhou<sup>\*b</sup> and Zhaoxin Wu<sup>\*c,d</sup>*

<sup>a</sup>Dr. Y. Yu, Dr. L. Ma, Dr. H. Zhou, Dr. H. Qin, Dr. H. Li, Dr. J. Song  
School of Physics and Optoelectronic Engineering  
Xidian University  
Xi'an 710071, P. R. China  
E-mail: linma@xidian.edu.cn

<sup>b</sup>Dr. Y. Yu, Dr. Z. Feng, Dr. B. Liu, Prof. G. Zhou  
Department of Chemistry, School of Science  
Xi'an Jiaotong University  
Xi'an 710049, P. R. China  
E-mail: zhougj@mail.xjtu.edu.cn

<sup>c</sup>Prof. Z. Wu  
Key Laboratory of Photonics Technology for Information  
Department of Electronic Science and Technology, School of Electronic and Information Engineering  
Xi'an Jiaotong University  
Xi'an 710049, P. R. China  
E-mail: zhaoxinwu@mail.xjtu.edu.cn

<sup>d</sup>Prof. Z. Wu  
Collaborative Innovation Center of Extreme Optics  
Shanxi University  
Taiyuan 030006, P. R. China

Keywords: (electroluminescent fluorescent, charge transfer, exciton utilization, hot exciton, efficiency roll-off)

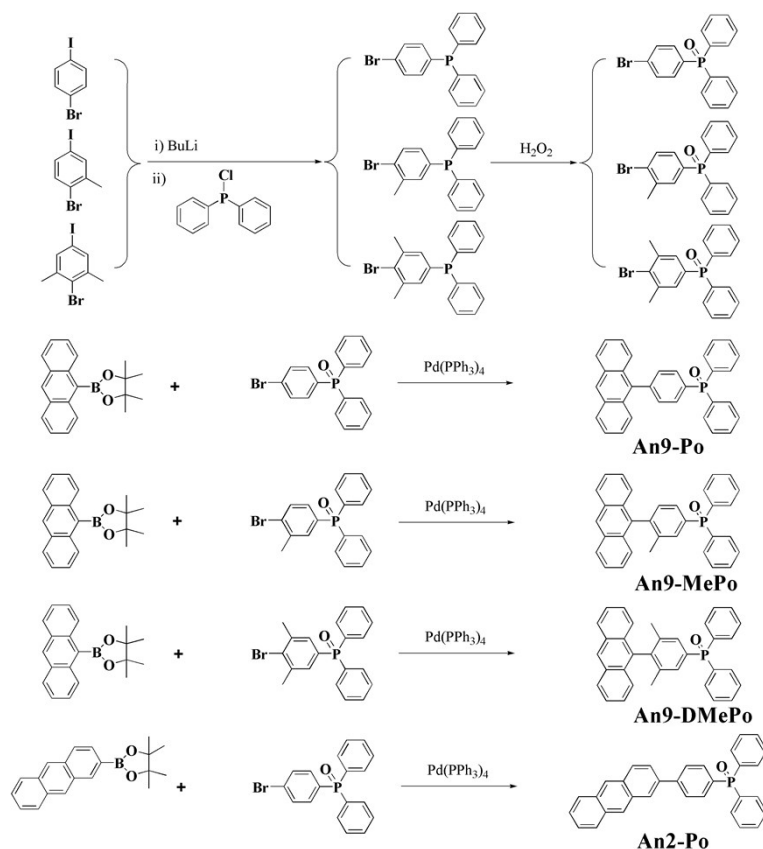

**Scheme 1** Molecular structures and the synthetic routes to An9-Po, An9-MePo, An9-DMePo and An2-Po.

**Synthesis of 1-Bromo-4-(diphenyl-phosphinoyl)-benzene:** Under the N<sub>2</sub> atmosphere, 1-Bromo-4-iodo-benzene (2.32g, 8.20 mmol) were dissolved in anhydrous tetrahydrofuran (50 mL). The solution was cooled to  $-78$  °C and added *n*-BuLi (3.96 mL, 9.90 mmol, 2.5 M in hexane). After stirred for 45 min, chlorodiphenylphosphine (1.49 mL, 8.20 mmol) was added to the mixture and reacted at room temperature overnight. Dilute hydrochloric acid was added to the mixture to adjust pH value to *ca.* 7.0 and the mixture was extracted with CH<sub>2</sub>Cl<sub>2</sub> (3 × 15 mL), the organic layer was dried over anhydrous Na<sub>2</sub>SO<sub>4</sub> and evaporated under reduced pressure. The crude product was re-dissolved in tetrahydrofuran (50 mL), H<sub>2</sub>O<sub>2</sub> (10 mL, 30%) was added to the solution dropwise. After react at rt. for 2 h, the mixture was extracted with CH<sub>2</sub>Cl<sub>2</sub> (3 × 15 mL), the organic layer was dried over anhydrous Na<sub>2</sub>SO<sub>4</sub> and evaporated under reduced pressure. Then, the residue was purified by column chromatography over silica gel using CH<sub>2</sub>Cl<sub>2</sub>/EtOAc (6:1 v/v) as the eluent.

Yellow solid was obtained (2.25 g, 76.8%). <sup>1</sup>H NMR (400 MHz, CDCl<sub>3</sub>, δ): 7.65–7.62 (m, 3H), 7.61–7.56 (m, 3H), 7.55–7.49 (m, 4H), 7.46–7.42 (m, 4H). <sup>13</sup>C NMR (100 MHz, CDCl<sub>3</sub>, δ): 133.72, 133.61, 132.66, 132.35, 132.25, 132.23, 132.13, 132.03, 131.95, 131.83, 131.61, 131.32, 128.76, 128.64, 127.26, 127.23. <sup>31</sup>P NMR (161.9 MHz, CDCl<sub>3</sub>, δ): 28.97. Anal. Calcd for C<sub>18</sub>H<sub>14</sub>BrPO: C, 60.50; H, 3.92. Found: C, 60.47; H, 3.88.

**Synthesis of 4-Bromo-3-methyl-phenyl)-diphenyl-phosphane:** Under the N<sub>2</sub> atmosphere, 1-Bromo-4-iodo-2-methyl-benzene (2.44g, 8.20 mmol) were dissolved in anhydrous tetrahydrofuran (50 mL). The solution was cooled to □78 °C and added *n*-BuLi (3.96 mL, 9.90 mmol, 2.5 M in hexane). After stirred for 45 min, chlorodiphenylphosphine (1.49 mL, 8.20 mmol) was added to the mixture and reacted at room temperature overnight. Dilute hydrochloric acid was added to the mixture to adjust pH value to *ca.* 7.0 and the mixture was extracted with CH<sub>2</sub>Cl<sub>2</sub> (3 × 15 mL), the organic layer was dried over anhydrous Na<sub>2</sub>SO<sub>4</sub> and evaporated under reduced pressure. The crude product was re-dissolved in tetrahydrofuran (50 mL), H<sub>2</sub>O<sub>2</sub> (10 mL, 30%) was added to the solution dropwise. After react at rt. for 2 h, the mixture was extracted with CH<sub>2</sub>Cl<sub>2</sub> (3 × 15 mL), the organic layer was dried over anhydrous Na<sub>2</sub>SO<sub>4</sub> and evaporated under reduced pressure. Then, the residue was purified by column chromatography over silica gel using CH<sub>2</sub>Cl<sub>2</sub>/EtOAc (6:1 v/v) as the eluent. White solid was obtained (2.04 g, 67.1%). <sup>1</sup>H NMR (400 MHz, CDCl<sub>3</sub>, δ): 7.67 – 7.59 (m, 6H), 7.55 (td, *J* = 7.6, 1.6 Hz, 2H), 7.48 – 7.44 (m, 4H), 7.25 – 7.20 (m, 1H), 2.40 (s, 3H). <sup>13</sup>C NMR (100 MHz, CDCl<sub>3</sub>, δ): 138.74, 138.62, 134.11, 134.01, 132.60, 132.55, 132.43, 132.10, 132.07, 132.03, 131.93, 131.57, 131.14, 130.71, 130.60, 129.62, 128.62, 128.50, 22.95. <sup>31</sup>P NMR (162 MHz, CDCl<sub>3</sub>, δ): 28.66. Calcd for C<sub>19</sub>H<sub>16</sub>BrPO: C, 61.46; H, 4.31. Found: C, 61.39; H, 4.26.

**Synthesis of 2-Bromo-5-(diphenyl-phosphinoyl)-1,3-dimethyl-benzene:** Under the N<sub>2</sub> atmosphere, 2-Bromo-5-iodo-1,3-dimethyl-benzene (2.56g, 8.20 mmol) were dissolved in anhydrous tetrahydrofuran (50 mL). The solution was cooled to □78 °C

and added *n*-BuLi (3.96 mL, 9.90 mmol, 2.5 M in hexane). After stirred for 45 min, chlorodiphenylphosphine (1.49 mL, 8.20 mmol) was added to the mixture and reacted at room temperature overnight. Dilute hydrochloric acid was added to the mixture to adjust pH value to *ca.* 7.0 and the mixture was extracted with CH<sub>2</sub>Cl<sub>2</sub> (3 × 15 mL), the organic layer was dried over anhydrous Na<sub>2</sub>SO<sub>4</sub> and evaporated under reduced pressure. The crude product was re-dissolved in tetrahydrofuran (50 mL), H<sub>2</sub>O<sub>2</sub> (10 mL, 30%) was added to the solution dropwise. After react at rt. for 2 h, the mixture was extracted with CH<sub>2</sub>Cl<sub>2</sub> (3 × 15 mL), the organic layer was dried over anhydrous Na<sub>2</sub>SO<sub>4</sub> and evaporated under reduced pressure. Then, the residue was purified by column chromatography over silica gel using CH<sub>2</sub>Cl<sub>2</sub>/EtOAc (6:1 v/v) as the eluent. White solid was obtained (2.27 g, 71.9%). <sup>1</sup>H NMR (400 MHz, CDCl<sub>3</sub>, δ): 7.67 – 7.62 (m, 4H), 7.57 – 7.52 (m, 2H), 7.48 – 7.44 (m, 4H), 7.35 (d, *J* = 12.0 Hz, 2H), 2.40 (s, 6H). <sup>13</sup>C NMR (100 MHz, CDCl<sub>3</sub>, δ): 139.04, 138.91, 132.86, 132.36, 132.10, 132.06, 132.04, 132.00, 131.82, 131.36, 131.26, 130.28, 128.63, 128.51, 24.03. <sup>31</sup>P NMR (162 MHz, CDCl<sub>3</sub>, δ): 28.38. Calcd for C<sub>20</sub>H<sub>18</sub>BrPO: C, 62.34; H, 4.68. Found: C, 62.29; H, 4.65.

**Synthesis of 9-[4-(Diphenyl-phosphinoyl)-phenyl]-anthracene (An9-Po):** Under the N<sub>2</sub> atmosphere, 4-Bromo-3-methyl-phenyl)-diphenyl-phosphane (1.79g, 5 mmol), 9-Anthraceneboronic acid (1.22g, 5.5 mmol) and Pd(PPh<sub>3</sub>)<sub>4</sub> (0.17 g, 0.15 mmol) were added to a flask containing THF (50 mL) and aqueous solution of Na<sub>2</sub>CO<sub>3</sub> (2.0 M, 25 mL). The reaction mixture was heated at 110 °C and stirred for 24 h under a nitrogen atmosphere. After it was cooled to room temperature, the reaction mixture was extracted with CH<sub>2</sub>Cl<sub>2</sub>. All the organic phase was combined and dried with anhydrous MgSO<sub>4</sub>. Then, the solvent was removed in vacuum and the resultant residue was purified by column chromatography using a proper petroleum ether/CH<sub>2</sub>Cl<sub>2</sub> eluent system to give the target product (White solid, 1.86 g, 81.9%). <sup>1</sup>H NMR (400 MHz, CDCl<sub>3</sub>, δ): 8.53 (s, 1H), 8.06 (d, *J* = 8.8 Hz, 2H), 7.90 – 7.81 (m, 6H), 7.62 – 7.60 (m, 2H), 7.58 – 7.53 (m, 7H), 7.49 – 7.45 (m, 3H), 7.40 – 7.36 (m, 2H). <sup>13</sup>C NMR (100 MHz, CDCl<sub>3</sub>, δ): 142.95, 132.87, 132.28, 132.22, 132.18, 132.12, 132.09, 132.01,

131.91, 131.83, 131.57, 131.52, 131.45, 131.24, 131.21, 131.00, 129.83, 128.69, 128.57, 128.42, 127.16, 126.29, 125.71, 125.20. <sup>31</sup>P NMR (162 MHz, CDCl<sub>3</sub>, δ): 29.49. Anal. Calcd for C<sub>32</sub>H<sub>23</sub>PO: C, 84.58; H, 5.07. Found: C, 84.49; H, 5.05.

**Synthesis of 9-[4-(Diphenyl-phosphinoyl)-2-methyl-phenyl]-anthracene (An9-MePo):** Under the N<sub>2</sub> atmosphere, 4-Bromo-3-methyl-phenyl)-diphenyl-phosphane (1.86g, 5 mmol), 9-Anthraceneboronic acid (1.22g, 5.5 mmol) and Pd(PPh<sub>3</sub>)<sub>4</sub> (0.17 g, 0.15 mmol) were added to a flask containing THF (50 mL) and aqueous solution of Na<sub>2</sub>CO<sub>3</sub> (2.0 M, 25 mL). The reaction mixture was heated at 110 °C and stirred for 24 h under a nitrogen atmosphere. After it was cooled to room temperature, the reaction mixture was extracted with CH<sub>2</sub>Cl<sub>2</sub>. All the organic phase was combined and dried with anhydrous MgSO<sub>4</sub>. Then, the solvent was removed in vacuum and the resultant residue was purified by column chromatography using a proper petroleum ether/CH<sub>2</sub>Cl<sub>2</sub> eluent system to give the target product (White solid, 1.85 g, 78.9%). <sup>1</sup>H NMR (400 MHz, CDCl<sub>3</sub>, δ): 8.52 (s, 1H), 8.06 (d, *J* = 8.4 Hz, 2H), 7.86 – 7.81 (m, 5H), 7.61 – 7.53 (m, 6H), 7.49 – 7.44 (m, 5H), 7.39 – 7.33 (m, 3H), 1.87 (s, 3H). <sup>13</sup>C NMR (100 MHz, CDCl<sub>3</sub>, δ): 142.51, 142.48, 138.79, 138.67, 134.78, 133.61, 133.52, 133.02, 132.97, 132.51, 132.21, 132.11, 132.00, 131.29, 131.25, 129.54, 129.50, 129.43, 128.63, 128.55, 128.52, 128.40, 126.91, 125.96, 125.81, 125.23, 19.77. <sup>31</sup>P NMR (162 MHz, CDCl<sub>3</sub>, δ): 29.53. Anal. Calcd for C<sub>33</sub>H<sub>25</sub>PO: C, 84.62; H, 5.34. Found: C, 84.53; H, 5.39.

**Synthesis of 9-[4-(Diphenyl-phosphinoyl)-2,6-dimethyl-phenyl]-anthracene (An9-DMePo):** Under the N<sub>2</sub> atmosphere, 2-Bromo-5-(diphenyl-phosphinoyl)-1,3-dimethyl-benzene (1.93g, 5 mmol), 9-Anthraceneboronic acid (1.22g, 5.5 mmol) and Pd(PPh<sub>3</sub>)<sub>4</sub> (0.17 g, 0.15 mmol) were added to a flask containing THF (50 mL) and aqueous solution of Na<sub>2</sub>CO<sub>3</sub> (2.0 M, 25 mL). The reaction mixture was heated at 110 °C and stirred for 24 h under a nitrogen atmosphere. After it was cooled to room temperature, the reaction mixture was extracted with CH<sub>2</sub>Cl<sub>2</sub>. All the organic phase was combined and dried with anhydrous MgSO<sub>4</sub>. Then, the solvent was removed in vacuum and the resultant residue was purified by column chromatography using a

proper petroleum ether/CH<sub>2</sub>Cl<sub>2</sub> eluent system to give the target product (White solid, 1.83 g, 75.9%). <sup>1</sup>H NMR (400 MHz, CDCl<sub>3</sub>, δ): 7.67 – 7.62 (m, 6H), 7.57 – 7.53 (m, 3H), 7.48 – 7.43 (m, 8H), 7.36 – 7.31 (m, 3H), 7.18 (t, *J* = 7.2 Hz, 1H), 2.40 (s, 6H). <sup>13</sup>C NMR (100 MHz, CDCl<sub>3</sub>, δ): 138.97, 138.85, 134.44, 134.37, 132.72, 132.34, 132.31, 132.01, 131.98, 131.92, 131.68, 131.28, 131.18, 130.15, 130.02, 128.57, 128.44, 128.09, 127.97, 127.87, 127.82, 127.75, 23.97. <sup>31</sup>P NMR (162 MHz, CDCl<sub>3</sub>, δ): 28.76. Anal. Calcd for C<sub>34</sub>H<sub>27</sub>PO: C, 84.65; H, 5.60. Found: C, 84.69; H, 5.67.

**Synthesis of 2-[4-(Diphenyl-phosphinoyl)-phenyl]-anthracene (An2-Po):** Under the N<sub>2</sub> atmosphere, 4-Bromo-3-methyl-phenyl)-diphenyl-phosphane (1.79g, 5 mmol), 2-Anthraceneboronic acid (1.22g, 5.5 mmol) and Pd(PPh<sub>3</sub>)<sub>4</sub> (0.17 g, 0.15 mmol) were added to a flask containing THF (50 mL) and aqueous solution of Na<sub>2</sub>CO<sub>3</sub> (2.0 M, 25 mL). The reaction mixture was heated at 110 °C and stirred for 24 h under a nitrogen atmosphere. After it was cooled to room temperature, the reaction mixture was extracted with CH<sub>2</sub>Cl<sub>2</sub>. All the organic phase was combined and dried with anhydrous MgSO<sub>4</sub>. Then, the solvent was removed in vacuum and the resultant residue was purified by column chromatography using a proper petroleum ether/CH<sub>2</sub>Cl<sub>2</sub> eluent system to give the target product (White solid, 1.90 g, 83.9%). <sup>1</sup>H NMR (400 MHz, CDCl<sub>3</sub>, δ): 8.49 (s, 1H), 8.45 (s, 1H), 8.24 (s, 1H), 8.10 (d, *J* = 8.8 Hz, 1H), 8.02 (m, 2H), 7.88 – 7.86 (m, 2H), 7.82 (d, *J* = 8.4 Hz, 1H), 7.79 (d, *J* = 8.0 Hz, 1H), 7.77 – 7.72 (m, 5H), 7.60 – 7.56 (m, 2H), 7.53 – 7.48 (m, 6H). <sup>13</sup>C NMR (100 MHz, CDCl<sub>3</sub>, δ): 136.44, 132.77, 132.67, 132.18, 132.14, 132.08, 132.00, 131.98, 131.61, 130.99, 129.11, 128.62, 128.50, 128.22, 128.18, 127.40, 127.27, 126.90, 126.47, 126.12, 125.69, 124.91. <sup>31</sup>P NMR (162 MHz, CDCl<sub>3</sub>, δ): 29.05. Anal. Calcd for C<sub>32</sub>H<sub>23</sub>PO: C, 84.58; H, 5.07. Found: C, 84.52; H, 5.10.

### **The solvatochromic Lippert-Mataga model**

We used the Lippert-Mataga equation, which describes the interactions between the solvent and the dipole moment of solute to estimate the dipole moments of S<sub>1</sub> state:

$$hc(\nu_a - \nu_f) = hc(\nu_a^0 - \nu_f^0) - \frac{2(\mu_e - \mu_g)^2}{a_0^3} f(\varepsilon, n)$$

Take differential on both sides of the above equation, we got

$$\mu_e = \mu_g + \left\{ \frac{hca_0^3}{2} \cdot \left[ \frac{d(\nu_a - \nu_f)}{df(\varepsilon, n)} \right] \right\}^{1/2}$$

where  $h$  is the Plank constant,  $c$  is the light speed in vacuum,  $f(\varepsilon, n)$  is the orientational polarizability of solvents,  $\nu_a^0 - \nu_f^0$  is the Stokes shifts when  $f$  is zero,  $\mu_e$  and  $\mu_g$  are dipole moments of excited-state and ground-state, respectively;  $a_0$  is the solvent Onsager cavity radius, derived from the Avogadro number ( $N$ ), molecular weight ( $M$ ), and density ( $d=1.0 \text{ g/cm}^3$ );  $\varepsilon$  is the solvent dielectric constant and  $n$  is the solvent refractive index;  $\mu_g$  of An9-Po, An9-MePo, An9-DmePo and An2-Po could be estimated from density-functional-theory (DFT) calculation at the level of B3LYP/6-31g(d,p) from Gaussian09 package, which gave  $\mu_g$  of 4.1 D, 4.5 D, 4.3 D and 4.3 D, respectively.  $f(\varepsilon, n)$  and  $a_0$  can be calculated as follows:

$$f(\varepsilon, n) = \frac{\varepsilon - 1}{2\varepsilon + 1} - \frac{n^2 - 1}{2n^2 + 1}, \quad a_0 = \left( \frac{3M}{4N\pi d} \right)^{1/3}$$

The detailed data are listed in Table S1. For An9-Po, An9-MePo, An9-DmePo and An2-Po, the  $\mu_e$  was estimated to be 6.5 D (slope value of  $\approx 646$ ,  $R= 0.80$ ), 6.9 D (slope value of  $\approx 628$ ,  $R= 0.64$ ), 6.2 D (slope value of  $\approx 373$ ,  $R= 0.55$ ) and 8.9 D (slope value of  $\approx 2283$ ,  $R= 0.85$ ), respectively.

**Table S1.** The data about absorption and emission peak positions of An9-Po, An9-MePo, An9-DmePo and An2-Po in different solvents.

| Solvents | $\varepsilon$ | $n$ | $f(\varepsilon, n)$ | An9-Po      |             |                     | An9-MePo    |             |                     | An9-DmePo   |             |                     | An2-Po      |             |                     |
|----------|---------------|-----|---------------------|-------------|-------------|---------------------|-------------|-------------|---------------------|-------------|-------------|---------------------|-------------|-------------|---------------------|
|          |               |     |                     | $\lambda_a$ | $\lambda_f$ | $\nu_a - \nu_f$     |
|          |               |     |                     | (n)         | (n)         | (cm <sup>-1</sup> ) |

|                     |     |      |       | m) | m) | l)   | m) | m) |      | m) | m) | l)   | m) | m) | l)   |
|---------------------|-----|------|-------|----|----|------|----|----|------|----|----|------|----|----|------|
| Hexane              | 1.9 | 1.37 | 0.001 | 38 | 42 | 2277 | 38 | 41 | 1761 | 24 | 41 | 1722 | 38 | 42 | 2010 |
|                     |     | 5    | 2     | 5  | 2  |      | 5  | 3  |      | 1  | 2  | 2    | 9  | 2  |      |
| Toluene             | 2.3 | 1.49 | 0.014 | 38 | 42 | 2445 | 38 | 41 | 2051 | 24 | 41 | 1745 | 38 | 43 | 2505 |
|                     | 8   | 4    |       | 5  | 5  |      | 5  | 8  |      | 1  | 6  | 6    | 9  | 1  |      |
| Triethylamin<br>e   | 2.4 | 1.40 | 0.048 | 38 | 43 | 2879 | 38 | 41 | 1878 | 24 | 41 | 1739 | 38 | 43 | 2928 |
|                     | 2   | 1    |       | 5  | 3  |      | 5  | 5  |      | 1  | 5  | 8    | 9  | 9  |      |
| Butyl ether         | 3.0 | 1.39 | 0.096 | 38 | 42 | 2277 | 38 | 41 | 1819 | 24 | 41 | 1733 | 38 | 42 | 2178 |
|                     | 8   | 9    |       | 5  | 2  |      | 5  | 4  |      | 1  | 4  | 9    | 9  | 5  |      |
| Isopropyl<br>ether  | 3.8 | 1.36 | 0.145 | 38 | 42 | 2333 | 38 | 41 | 1819 | 24 | 41 | 1728 | 38 | 42 | 2288 |
|                     | 8   | 8    |       | 5  | 3  |      | 5  | 4  |      | 1  | 3  | 1    | 9  | 7  |      |
| Ethyl ether         | 4.3 | 1.35 | 0.167 | 38 | 42 | 2266 | 38 | 41 | 1878 | 24 | 41 | 1728 | 39 | 42 | 2331 |
|                     | 4   | 2    |       | 6  | 3  |      | 5  | 5  |      | 1  | 3  | 1    | 0  | 9  |      |
| Ethyl acetate       | 6.0 | 1.37 | 0.200 | 38 | 42 | 2322 | 38 | 41 | 1811 | 24 | 41 | 1733 | 39 | 43 | 2385 |
|                     | 2   | 2    |       | 6  | 4  |      | 6  | 5  |      | 1  | 4  | 9    | 0  | 0  |      |
| Tetrahydrofu<br>ran | 7.5 | 1.40 | 0.210 | 38 | 42 | 2322 | 38 | 41 | 1926 | 24 | 41 | 1739 | 39 | 43 | 2546 |
|                     | 8   | 7    |       | 6  | 4  |      | 6  | 7  |      | 1  | 5  | 8    | 0  | 3  |      |
| dichlorometh<br>ane | 8.9 | 1.42 | 0.217 | 38 | 42 | 2378 | 38 | 41 | 1984 | 24 | 41 | 1745 | 39 | 43 | 2439 |
|                     | 3   | 4    |       | 6  | 5  |      | 6  | 8  |      | 1  | 6  | 6    | 0  | 1  |      |
| Acetone             | 20. | 1.35 | 0.284 | 38 | 42 | 2433 | 38 | 41 | 2041 | 24 | 41 | 1739 | 39 | 43 | 2546 |
|                     | 7   | 9    |       | 6  | 6  |      | 6  | 9  |      | 1  | 5  | 8    | 0  | 3  |      |
| Acetonitrile        | 37. | 1.34 | 0.305 | 38 | 42 | 2476 | 38 | 42 | 2154 | 24 | 41 | 1751 | 39 | 43 | 2758 |
|                     | 5   | 4    |       | 7  | 8  |      | 6  | 1  |      | 1  | 7  | 3    | 0  | 7  |      |



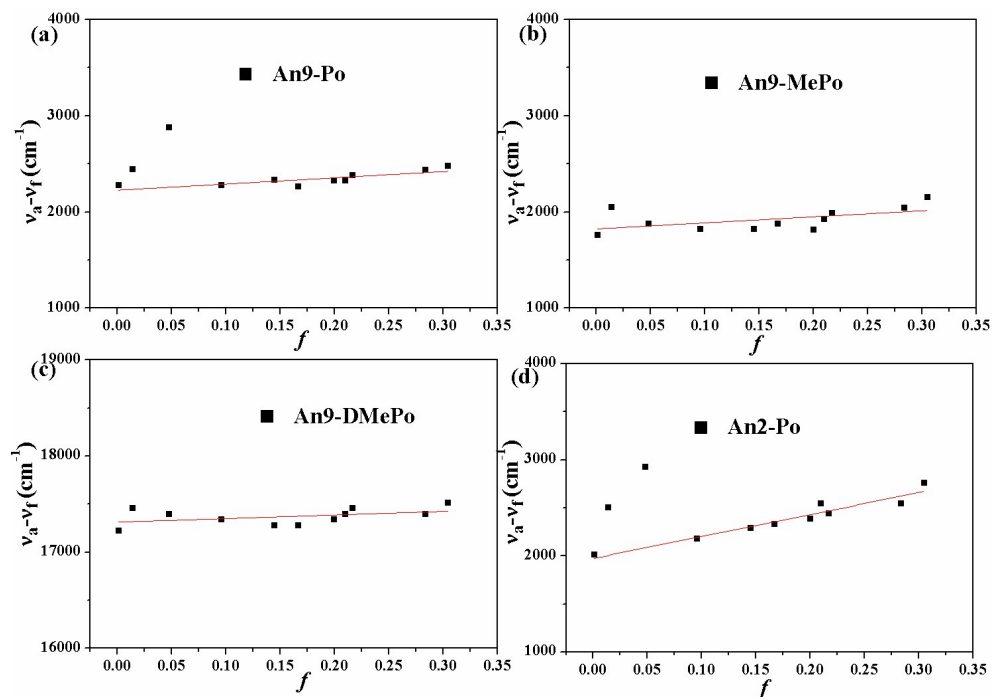

**Fig. S1** (a) Linear correlation of orientation polarization ( $f(\varepsilon, n)$ ) of solvent media with the Stokes shift ( $\nu_a - \nu_f$ ) for An9-Po. (b) Linear correlation of orientation polarization ( $f(\varepsilon, n)$ ) of solvent media with the Stokes shift ( $\nu_a - \nu_f$ ) for An9-MePo. (c) Linear correlation of orientation polarization ( $f(\varepsilon, n)$ ) of solvent media with the Stokes shift ( $\nu_a - \nu_f$ ) for An9-DMePo. (d) Linear correlation of orientation polarization ( $f(\varepsilon, n)$ ) of solvent media with the Stokes shift ( $\nu_a - \nu_f$ ) for An2-Po.

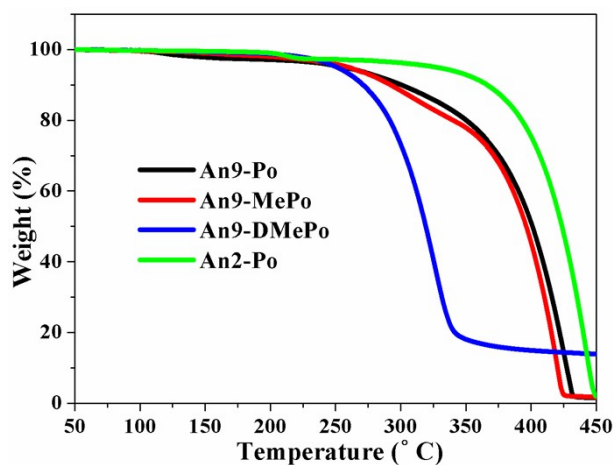

**Fig. S2** Thermogravimetric analyses of An9-Po, An9-MePo, An9-DMePo and An2-Po at a heating rate of 20 K min<sup>-1</sup>.

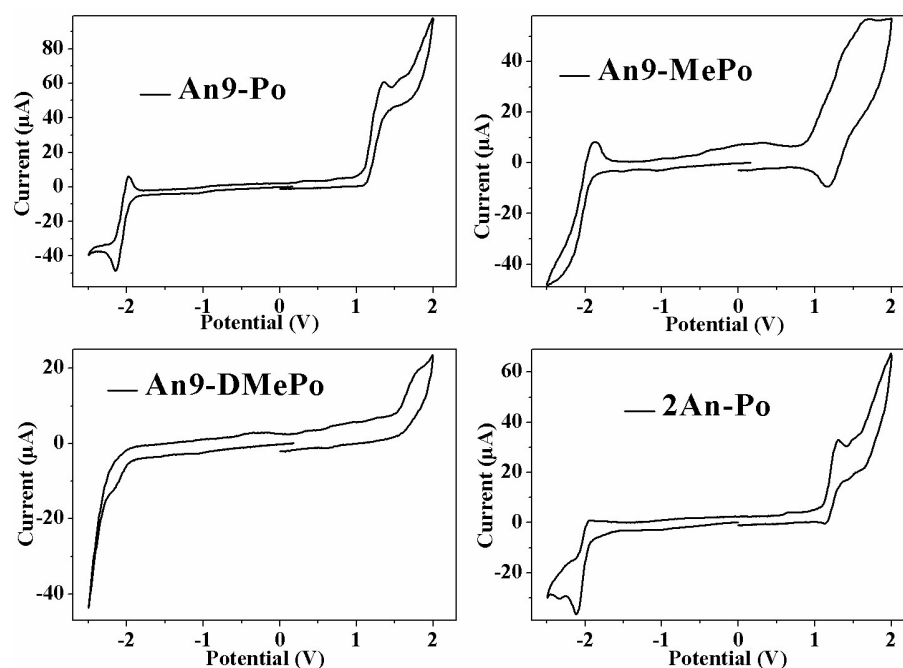

**Fig. S3** The cyclic voltammetry characteristics of An9-Po, An9-MePo, An9-DMePo and An2-Po.

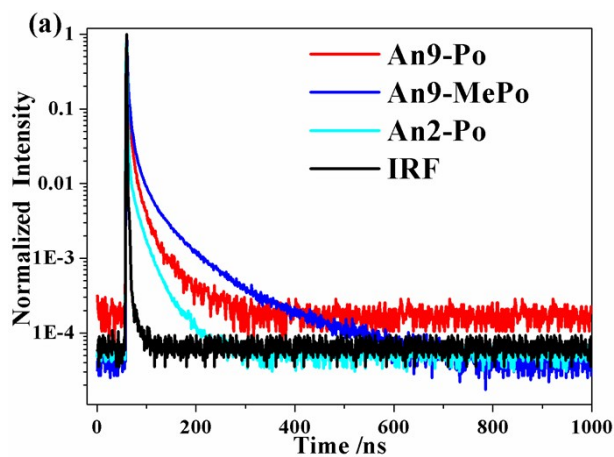

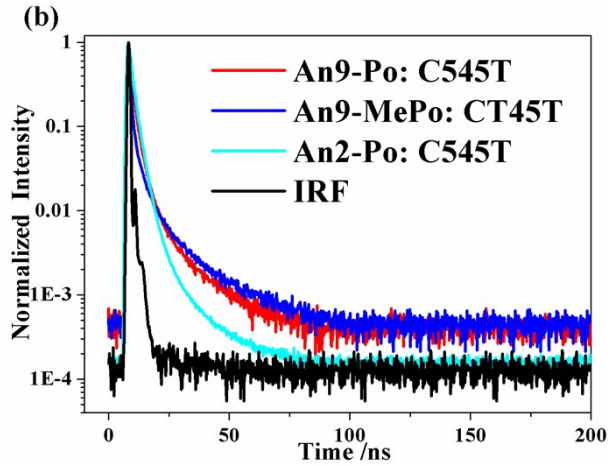

**Fig. S4** (a) Lifetime measurement of An9-Po, An9-MePo and An2-Po in thin film. (b) Lifetime measurement of 1 wt% An9-Po: C545T, An9-MePo: C545T and An2-Po: C545T in thin film.

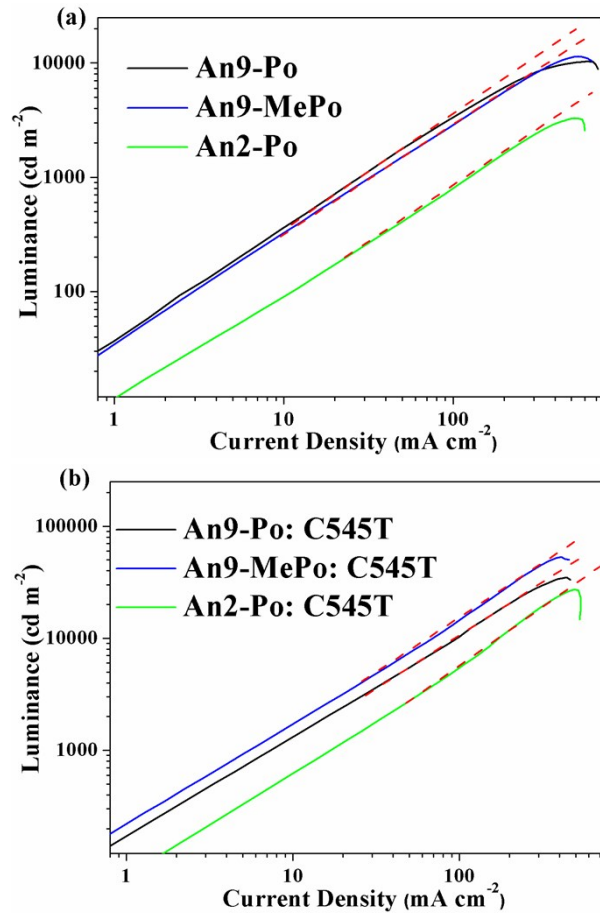

**Fig. S5** (a) The current-brightness characteristic of An9-Po, An9-MePo and An2-Po nondoped devices. (b) The current-brightness characteristic of C545T doped devices with An9-Po, An9-MePo and An2-Po as host.

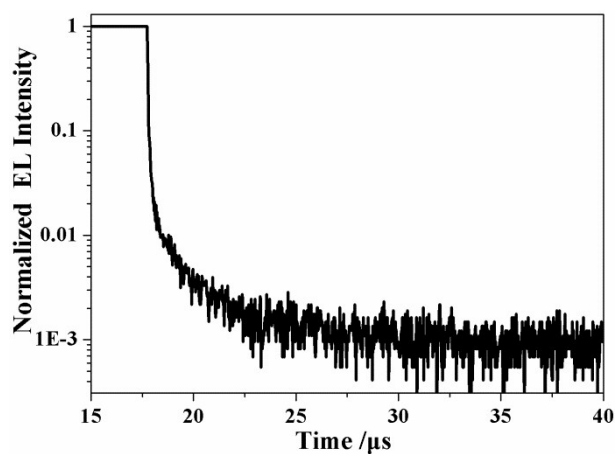

**Fig. S6** Electroluminescence delay of An-MePo non-doped OLED. The measurements of the transient electroluminescence were carried out using a transient spectrometer (Edinburg FL920P), and an Agilent 8114A pulse generator (100 V/2 A) was used to generate rectangular pulse voltage with a pulse width of 15  $\mu$ s. The forward-pulse voltage was 8 V, and the baseline was -5 V to eliminate any trapped charges.
